# Supplementary material for: CD18 Antibody Application Blocks Unwanted Off-Target T Cell Activation Caused by Bispecific Antibodies
Source: MDPI journal article supplement (doi:10.3390/cancers13184596), 2021-09-13
Supplement: s1 [file s1]

## Supplementary Fig. 1

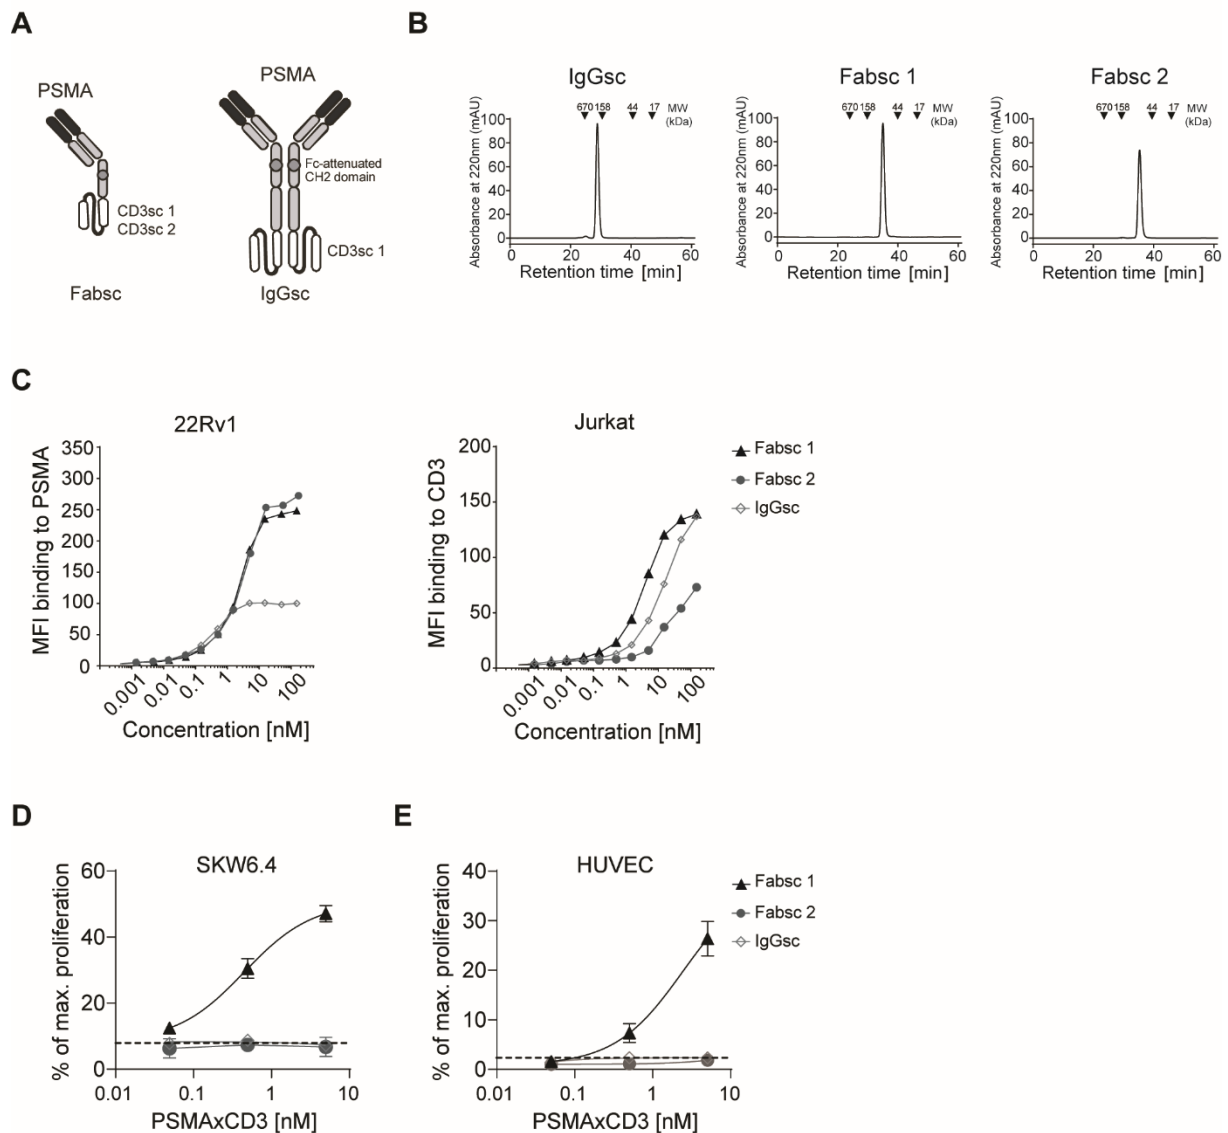

## Supplementary Fig. 1 Off-target T cell activation by different PSMAxCD3 bsAb.

(A) Schematic representation of two different bsAb formats: Fabsc and IgGsc. Mutations were introduced to the CH<sub>2</sub> domain in order to prevent FcR and complement binding (Fc attenuation). (B) Representative gel-filtration profiles of the IgGsc (PSMAx CD3) and Fabsc proteins, containing UCHT-1 (Fabsc 1) or OKT-3 (Fabsc 2) as a single chain (C) Binding of PSMAxCD3 antibodies in different formats to PSMA<sup>+</sup> 22Rv1 cells (left panel) and to CD3<sup>+</sup> Jurkat cells (right panel). (D) Off-target T cell proliferation in a 3 day <sup>3</sup>H-thymidine incorporation assay with PSMAxCD3 antibodies in different formats in the presence of 100,000 PBMC and 100,000 SKW6.4. (E) Off-target T cell proliferation in a thymidine assay with PSMAxCD3 antibodies in different formats in the presence of 100,000 PBMC and 50,000 HUVECs.

## Supplementary Fig. 2

**A**

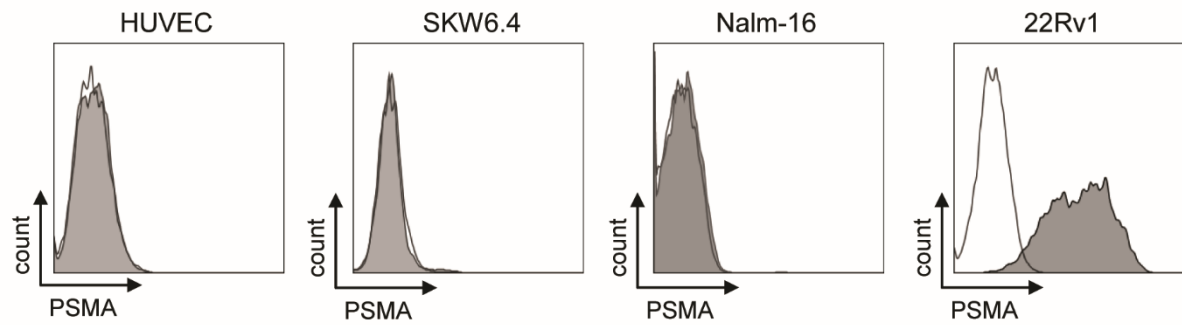

**B**

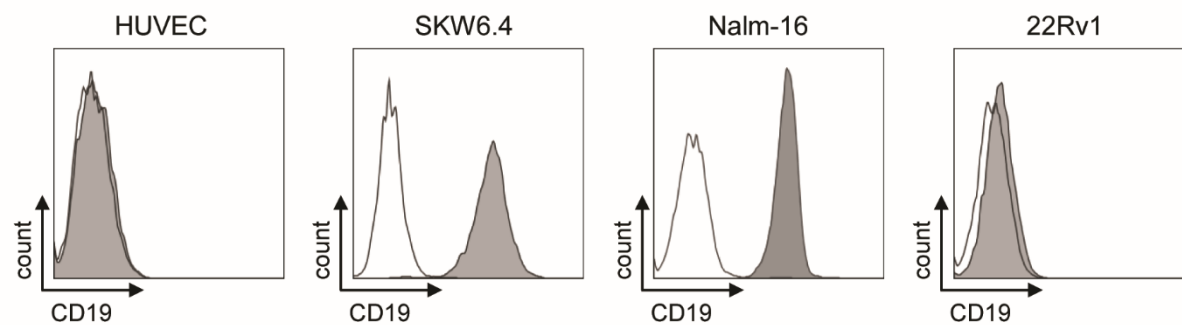

## Supplementary Fig. 2 Expression of PSMA and CD19 on SBC.

PSMAxCD3 (A) and CD19xCD3 (B) expression on different stimulating and non-stimulating cell lines was measured by flow cytometry (n=3, representative results shown). 22Rv1 cells serve as positive control for PSMA expression. Shaded peaks indicate specific binding of both constructs, open peaks indicate the signal obtained with an isotype control.

### Supplementary Fig. 3

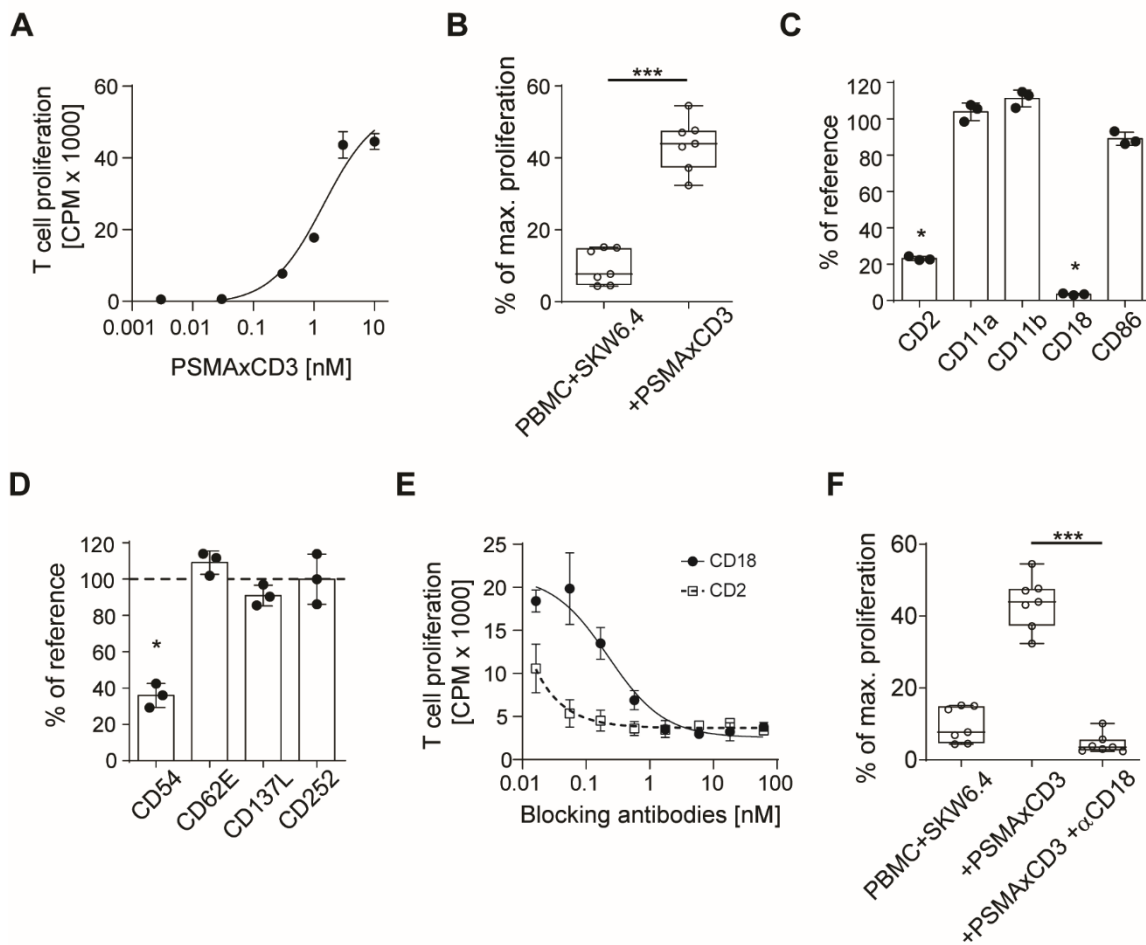

### Supplementary Fig. 3 Off-target T cell activation by bsAb in the presence of the SBC SKW6.4.

(A) Off-target T cell proliferation in a 3 day  $^3\text{H}$ -thymidine incorporation assay with a PSMAxCD3 bsAb in the presence of 100,000 PBMC and 100,000 SKW6.4. Representative results from experiments with PBMC from 5 different donors (mean  $\pm$  SD of triplicates). (B) 3 day thymidine assay as described in a (n=7) with a PSMAxCD3 bsAb at 5 nM (mean  $\pm$  SD, unpaired t-test). (C) Thymidine assay (n=3) using SKW6.4 and a PSMAxCD3 antibody at 5 nM. Addition of different blocking antibodies directed against costimulatory molecules on T cells (mean  $\pm$  SD, unpaired t-test). (D) Inhibition of off-target activation by different blocking antibodies directed against costimulatory/adhesion molecules on SBCs in a thymidine assay with a PSMAxCD3 bsAb at 5 nM (n=3, mean  $\pm$  SD, unpaired t-test). (E) Inhibition of off-target activation by CD18 and CD2 antibodies in a thymidine assay as described in C (n=3, mean  $\pm$  SD, unpaired t-test). (F) Inhibition of off-target activation by blocking antibodies against CD18 (n=7, boxplots with min/max whiskers, unpaired t-test) as analyzed by thymidine assays as described in C. \*p < 0.05, \*\*p < 0.01, \*\*\*p < 0.001.

### Supplementary Fig. 4

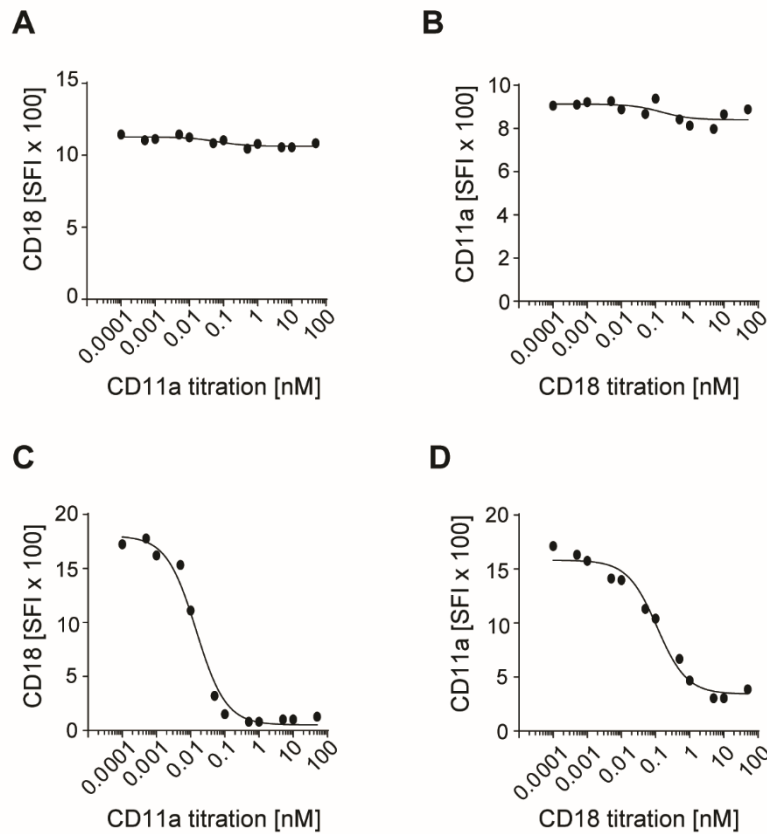

### Supplementary Fig. 4 CD11a/CD18 competition and antigen shift assays.

On-target activated T cells (n=6 donors, mean values), in the presence of Nalm-16 and CD19xCD3 bsAb were used for a competition and antigen shift assays. **(A-B)** A competition assay was performed, during which CD11a **(A)** or CD18 **(B)** antibodies were titrated and incubated for 1 hour at 4°C. Subsequently, cells were incubated for an additional hour with 10 µg/ml of directly labeled CD18-PE **(A)** or CD11a-PE **(B)**. The results were analyzed by flow cytometry. **(C-D)** Antigen shift assay was performed using on-target activated T cells, which were incubated for 30 hours at 37°C with ascending concentrations of CD11a **(C)** or CD18 **(D)** antibodies. Saturating amounts of directly labeled CD18-PE (10 µg/ml) antibodies **(C)** or unconjugated CD18 antibodies **(D)** were added for one hour at 4°C. All results were obtained by flow cytometry.

## Supplementary Fig. 5

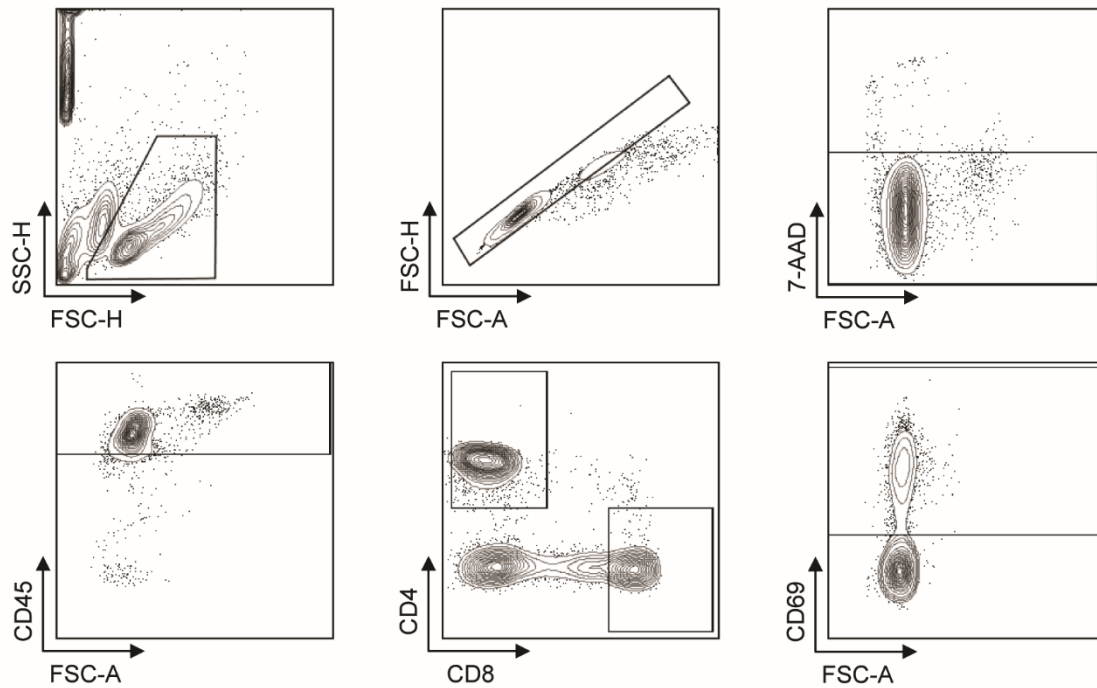

### Supplementary Fig. 5 Exemplary gating strategy for flow cytometry-based assays.

(A) Exemplary gating strategy and representative data set for flow cytometry-based assays: Mononuclear cells, singlets, viable (7-AAD<sup>-</sup>), CD45<sup>+</sup>, CD4<sup>+</sup> or CD8<sup>+</sup> T cells, CD69<sup>+</sup> activated T cells.

## Supplementary Fig. 6

**A**

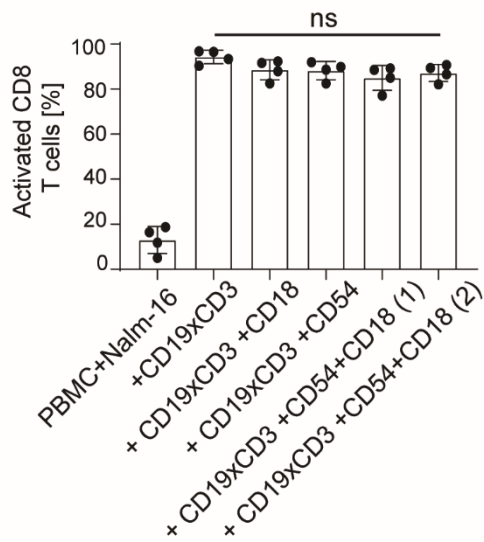

**B**

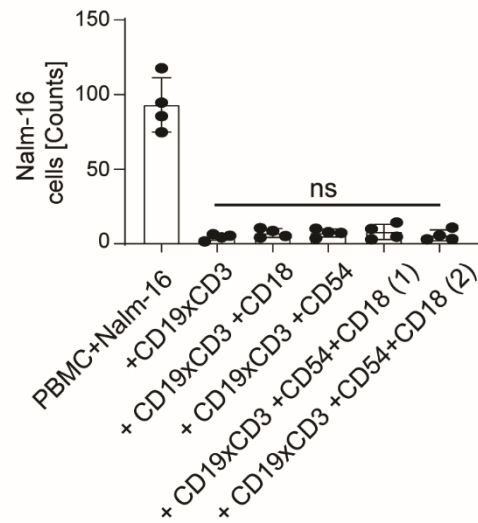

### Supplementary Fig. 6 CD18/CD54 blockade combination.

Nalm-16 cells and PBMCs from healthy donors (n=4 donors, mean values), were incubated in the presence of CD19xCD3 bsAb at a final concentration of 5nM. CD18 (1µg/ml), CD54(1µg/ml) antibody alone or in a combination with CD18 blockade at 0.1µg/ml (1) or 0.01µg/ml (2) were also added. On day 3, CD8 T cell activation (**A**) and Nalm-16 cell kill (**B**) were analyzed by flow cytometry. Statistical analyses were performed using unpaired t-test (n=4, mean± SD). ns : non-significant.
